# Supplementary material
Source: PubMed Central journal article supplement (PMC9992689)
Supplement: 10068_2022_1232_MOESM1_ESM.pdf [file 10068_2022_1232_MOESM1_ESM.pdf]

1  
2  
3  
4

Supplementray Information

**Genome analysis revealed a repertoire of oligosaccharide utilizing  
CAZymes in *Weissella confusa* CCK931 and *Weissella cibaria* YRK005**

5 **Table S1. Number of genes associated with general COG functional categories.**

| COG category distribution          | Description                                                   | Code     | <i>W. cibaria</i> -YRK005 |       | <i>W. confusa</i> -CCK931 |       |
|------------------------------------|---------------------------------------------------------------|----------|---------------------------|-------|---------------------------|-------|
|                                    |                                                               |          | Value                     | %     | Value                     | %     |
| CELLULAR PROCESSES AND SIGNALING   | Cell cycle control, cell division, chromosome partitioning    | <b>D</b> | 30                        | 1.36% | 30                        | 1.36% |
|                                    | Cell wall/membrane/envelope biogenesis                        | <b>M</b> | 96                        | 4.37% | 111                       | 5.05% |
|                                    | Cell motility                                                 | <b>N</b> | 9                         | 0.41% | 8                         | 0.36% |
|                                    | Posttranslational modification, protein turnover, chaperones  | <b>O</b> | 48                        | 2.18% | 46                        | 2.09% |
|                                    | Signal transduction mechanisms                                | <b>T</b> | 38                        | 1.73% | 44                        | 2.00% |
|                                    | Intracellular trafficking, secretion, and vesicular transport | <b>U</b> | 11                        | 0.50% | 11                        | 0.50% |
|                                    | Defense mechanisms                                            | <b>V</b> | 45                        | 2.05% | 43                        | 1.96% |
| INFORMATION STORAGE AND PROCESSING | Translation, ribosomal structure and biogenesis               | <b>J</b> | 183                       | 8.32% | 182                       | 8.28% |
|                                    | Transcription                                                 | <b>K</b> | 103                       | 4.68% | 105                       | 4.78% |
|                                    | Replication, recombination and repair                         | <b>L</b> | 101                       | 4.59% | 93                        | 4.23% |
| METABOLISM                         | Energy production and conversion                              | <b>C</b> | 66                        | 3.00% | 66                        | 3.00% |
|                                    | Amino acid transport and metabolism                           | <b>E</b> | 123                       | 5.59% | 138                       | 6.28% |
|                                    | Nucleotide transport and metabolism                           | <b>F</b> | 96                        | 4.37% | 91                        | 4.14% |
|                                    | Carbohydrate transport and metabolism                         | <b>G</b> | 148                       | 6.73% | 156                       | 7.09% |
|                                    | Coenzyme transport and metabolism                             | <b>H</b> | 70                        | 3.18% | 71                        | 3.23% |
|                                    | Lipid transport and metabolism                                | <b>I</b> | 67                        | 3.05% | 68                        | 3.09% |
|                                    | Inorganic ion transport and metabolism                        | <b>P</b> | 83                        | 3.77% | 83                        | 3.77% |
|                                    | Secondary metabolites biosynthesis, transport and catabolism  | <b>Q</b> | 14                        | 0.64% | 17                        | 0.77% |
| POORLY CHARACTERISED               | General function prediction only                              | <b>R</b> | 84                        | 3.82% | 86                        | 3.91% |
|                                    | Function unknown                                              | <b>S</b> | 119                       | 5.41% | 111                       | 5.05% |

6

7 **Table S2: Number and types of CAZymes present in *W. cibaria* YRK005.**

| Sr. No. | Gene ID                  | Number of Tools | HMMER                       | DIAMOND | Hotpep    |
|---------|--------------------------|-----------------|-----------------------------|---------|-----------|
| 1.      | NZ_JACGMM010000001.1_1   | 1               | N                           | N       | GH25+GH73 |
| 2.      | NZ_JACGMM010000001.1_12  | 3               | GH73(42-180)                | GH73    | GH73      |
| 3.      | NZ_JACGMM010000001.1_14  | 3               | GT2_Glycos_transf_2(5-152)  | GT2     | GT2       |
| 4.      | NZ_JACGMM010000001.1_140 | 3               | GH2(20-629)                 | GH2     | GH2+CBM67 |
| 5.      | NZ_JACGMM010000001.1_150 | 3               | GH1(4-482)                  | GH1     | GH1       |
| 6.      | NZ_JACGMM010000001.1_151 | 1               | N                           | N       | GH25+GH73 |
| 7.      | NZ_JACGMM010000001.1_16  | 2               | GT2_Glycos_transf_2(4-171)  | GT2     | N         |
| 8.      | NZ_JACGMM010000001.1_17  | 2               | GT2_Glycos_transf_2(5-169)  | GT2     | N         |
| 9.      | NZ_JACGMM010000001.1_18  | 1               | N                           | N       | GH73      |
| 10.     | NZ_JACGMM010000001.1_192 | 3               | GT51(84-257)                | GT51    | GT51      |
| 11.     | NZ_JACGMM010000001.1_2   | 3               | GH25(46-226)                | GH25    | GH25+GH73 |
| 12.     | NZ_JACGMM010000001.1_208 | 2               | GH73(119-253)               | GH73    | N         |
| 13.     | NZ_JACGMM010000001.1_21  | 2               | N                           | GH23    | GH73      |
| 14.     | NZ_JACGMM010000001.1_227 | 3               | GH70(389-1182)              | GH70    | GH70      |
| 15.     | NZ_JACGMM010000001.1_307 | 3               | GH32(13-316)                | GH32    | GH32      |
| 16.     | NZ_JACGMM010000001.1_38  | 1               | N                           | N       | GH25+GH73 |
| 17.     | NZ_JACGMM010000001.1_51  | 3               | GT4(204-342)                | GT4     | GT4       |
| 18.     | NZ_JACGMM010000001.1_53  | 2               | GT2_Glycos_transf_2(16-159) | GT2     | N         |
| 19.     | NZ_JACGMM010000001.1_58  | 2               | GT2_Glycos_transf_2(26-123) | GT2     | N         |
| 20.     | NZ_JACGMM010000001.1_62  | 1               | N                           | N       | GH25+GH73 |
| 21.     | NZ_JACGMM010000001.1_75  | 1               | N                           | GH13_30 | N         |
| 22.     | NZ_JACGMM010000001.1_8   | 2               | GT111(3-216)                | GT111   | N         |
| 23.     | NZ_JACGMM010000002.1_103 | 3               | GH13_31(29-380)             | GH13_31 | GH13      |

|     |                          |   |               |       |          |
|-----|--------------------------|---|---------------|-------|----------|
| 24. | NZ_JACGMM010000002.1_126 | 2 | N             | CBM50 | CBM50    |
| 25. | NZ_JACGMM010000002.1_152 | 1 | N             | CBM50 | N        |
| 26. | NZ_JACGMM010000002.1_153 | 1 | N             | CBM50 | N        |
| 27. | NZ_JACGMM010000002.1_154 | 1 | N             | CBM50 | N        |
| 28. | NZ_JACGMM010000002.1_166 | 3 | GH3(36-275)   | GH3   | GH3+CBM6 |
| 29. | NZ_JACGMM010000002.1_229 | 1 | N             | GT13  | N        |
| 30. | NZ_JACGMM010000002.1_232 | 2 | GT4(374-560)  | GT4   | N        |
| 31. | NZ_JACGMM010000002.1_233 | 1 | N             | GT4   | N        |
| 32. | NZ_JACGMM010000002.1_271 | 1 | N             | GH28  | N        |
| 33. | NZ_JACGMM010000003.1_159 | 1 | N             | N     | GH73     |
| 34. | NZ_JACGMM010000003.1_175 | 3 | GH65(317-694) | GH65  | GH65     |
| 35. | NZ_JACGMM010000003.1_201 | 2 | GT4(324-478)  | GT4   | N        |
| 36. | NZ_JACGMM010000003.1_203 | 2 | GT4(323-436)  | GT4   | N        |
| 37. | NZ_JACGMM010000003.1_210 | 1 | N             | CBM50 | N        |
| 38. | NZ_JACGMM010000003.1_219 | 3 | GH1(9-483)    | GH1   | GH1      |
| 39. | NZ_JACGMM010000003.1_4   | 3 | GT4(159-309)  | GT4   | GT4      |
| 40. | NZ_JACGMM010000003.1_5   | 3 | GT4(202-331)  | GT4   | GT4      |
| 41. | NZ_JACGMM010000003.1_93  | 1 | N             | N     | GH23     |
| 42. | NZ_JACGMM010000004.1_109 | 2 | GT4(270-416)  | GT4   | N        |
| 43. | NZ_JACGMM010000004.1_134 | 2 | N             | CBM50 | CBM50    |
| 44. | NZ_JACGMM010000004.1_152 | 3 | GH1(4-482)    | GH1   | GH1      |
| 45. | NZ_JACGMM010000004.1_155 | 3 | GH1(6-479)    | GH1   | GH1      |
| 46. | NZ_JACGMM010000004.1_19  | 1 | N             | N     | GH23     |
| 47. | NZ_JACGMM010000004.1_60  | 1 | N             | GT2   | N        |
| 48. | NZ_JACGMM010000004.1_73  | 3 | GT28(188-352) | GT28  | GT28     |
| 49. | NZ_JACGMM010000004.1_8   | 3 | GH73(79-217)  | GH73  | GH73     |

|     |                          |   |                             |         |                  |
|-----|--------------------------|---|-----------------------------|---------|------------------|
| 50. | NZ_JACGMM010000005.1_144 | 1 | N                           | GT2     | N                |
| 51. | NZ_JACGMM010000005.1_190 | 3 | GH43_26(5-313)              | GH43_26 | GH43+CBM13+CBM42 |
| 52. | NZ_JACGMM010000005.1_211 | 2 | GT2_Glyco_tranf_2_3(49-279) | GT2     | N                |
| 53. | NZ_JACGMM010000005.1_213 | 3 | GH8(36-367)                 | GH8     | GH8              |
| 54. | NZ_JACGMM010000005.1_214 | 2 | N                           | GT0     | GT0              |
| 55. | NZ_JACGMM010000005.1_224 | 2 | GT2_Glycos_transf_2(5-90)   | GT2     | N                |
| 56. | NZ_JACGMM010000005.1_226 | 2 | GT2_Glycos_transf_2(6-112)  | GT2     | N                |
| 57. | NZ_JACGMM010000005.1_227 | 1 | N                           | GT2     | N                |
| 58. | NZ_JACGMM010000005.1_228 | 1 | GT2_Glycos_transf_2(5-135)  | N       | N                |
| 59. | NZ_JACGMM010000005.1_28  | 3 | GH1(2-463)                  | GH1     | GH1              |
| 60. | NZ_JACGMM010000005.1_45  | 2 | GT51(31-203)                | GT51    | N                |
| 61. | NZ_JACGMM010000006.1_130 | 3 | CE9(8-374)                  | CE9     | CE9              |
| 62. | NZ_JACGMM010000006.1_140 | 1 | N                           | CBM50   | N                |
| 63. | NZ_JACGMM010000006.1_7   | 2 | GT4(184-324)                | GT4     | N                |
| 64. | NZ_JACGMM010000007.1_19  | 2 | GT2_Glycos_transf_2(9-123)  | GT2     | N                |
| 65. | NZ_JACGMM010000007.1_25  | 3 | GH1(6-475)                  | GH1     | GH1              |
| 66. | NZ_JACGMM010000007.1_26  | 3 | GH1(5-456)                  | GH1     | GH1              |
| 67. | NZ_JACGMM010000007.1_33  | 1 | N                           | GH42    | N                |
| 68. | NZ_JACGMM010000007.1_60  | 2 | GT4(336-486)                | GT4     | N                |
| 69. | NZ_JACGMM010000007.1_61  | 2 | GT4(328-477)                | GT4     | N                |
| 70. | NZ_JACGMM010000007.1_80  | 1 | N                           | GH6     | N                |
| 71. | NZ_JACGMM010000007.1_87  | 3 | GH31(274-703)               | GH31    | GH31             |
| 72. | NZ_JACGMM010000008.1_22  | 1 | N                           | N       | GH73             |
| 73. | NZ_JACGMM010000008.1_3   | 3 | GH25(36-211)                | GH25    | GH25             |
| 74. | NZ_JACGMM010000008.1_61  | 3 | GT51(73-249)                | GT51    | GT51             |
| 75. | NZ_JACGMM010000008.1_81  | 1 | N                           | N       | GH23+CBM50       |

|     |                        |   |                               |              |                                 |
|-----|------------------------|---|-------------------------------|--------------|---------------------------------|
| 76. | NZ_JACGMM01000009.1_73 | 1 | N                             | N            | CE11                            |
| 77. | NZ_JACGMM01000010.1_18 | 1 | AA4(10-244)                   | N            | N                               |
| 78. | NZ_JACGMM01000011.1_11 | 3 | GH13_39(182-488)              | GH13_39      | GH13+GH77+CBM20+<br>CBM34+CBM48 |
| 79. | NZ_JACGMM01000011.1_12 | 3 | GT35(95-792)                  | GT35         | GT35                            |
| 80. | NZ_JACGMM01000011.1_13 | 3 | GT5(3-475)                    | GT5          | GT5                             |
| 81. | NZ_JACGMM01000011.1_15 | 1 | N                             | GH13_9       | N                               |
| 82. | NZ_JACGMM01000011.1_16 | 3 | CBM48(29-111)+GH13_9(177-473) | CBM48+GH13_9 | GH13+CBM48                      |
| 83. | NZ_JACGMM01000011.1_3  | 1 | N                             | AA1          | N                               |
| 84. | NZ_JACGMM01000011.1_31 | 3 | GH43_11(3-304)                | GH43_11      | GH43                            |
| 85. | NZ_JACGMM01000011.1_43 | 1 | N                             | CBM50        | N                               |
| 86. | NZ_JACGMM01000011.1_48 | 3 | GH1(3-277)                    | GH1          | GH1                             |
| 87. | NZ_JACGMM01000011.1_49 | 3 | GH1(5-177)                    | GH1          | GH1                             |
| 88. | NZ_JACGMM01000012.1_21 | 1 | N                             | GH6          | N                               |
| 89. | NZ_JACGMM01000012.1_38 | 1 | N                             | GH13_11      | N                               |
| 90. | NZ_JACGMM01000014.1_1  | 1 | N                             | GT4          | N                               |
| 91. | NZ_JACGMM01000016.1_6  | 1 | AA7(35-241)                   | N            | N                               |
| 92. | NZ_JACGMM01000018.1_7  | 1 | N                             | GH32         | N                               |

8

9

10

11

12

13

14 **Table S2: Number and types of CAZymes present in *W. confusa* CCK931.**

| Sr. No. | Gene ID                  | Number of Tools | HMMER                         | DIAMOND       | Hotpep           |
|---------|--------------------------|-----------------|-------------------------------|---------------|------------------|
| 1.      | NZ_JACGMJ010000001.1_100 | 3               | GT51(75-249)                  | GT51          | GT51             |
| 2.      | NZ_JACGMJ010000001.1_119 | 1               | N                             | N             | GH23             |
| 3.      | NZ_JACGMJ010000001.1_135 | 1               | GT111(3-215)                  | N             | N                |
| 4.      | NZ_JACGMJ010000001.1_142 | 2               | GH73(43-180)                  | N             | GH73             |
| 5.      | NZ_JACGMJ010000001.1_143 | 2               | GH25(5-135)                   | N             | GH25             |
| 6.      | NZ_JACGMJ010000001.1_145 | 3               | GT2_Glycos_transf_2(5-170)    | GT2           | GT2              |
| 7.      | NZ_JACGMJ010000001.1_149 | 1               | GT2_Glycos_transf_2(7-141)    | N             | N                |
| 8.      | NZ_JACGMJ010000001.1_150 | 2               | GT2_Glycos_transf_2(4-170)    | GT2           | N                |
| 9.      | NZ_JACGMJ010000001.1_153 | 2               | GT2_Glycos_transf_2(7-125)    | GT2           | N                |
| 10.     | NZ_JACGMJ010000001.1_180 | 1               | N                             | CBM50         | N                |
| 11.     | NZ_JACGMJ010000001.1_197 | 1               | N                             | GH13_30       | N                |
| 12.     | NZ_JACGMJ010000001.1_261 | 3               | GH2(26-628)                   | GH2           | GH2+CBM51+CBM67  |
| 13.     | NZ_JACGMJ010000001.1_34  | 3               | CBM34(6-131)+GH13_20(181-484) | CBM34+GH13_20 | GH13+CBM20+CBM34 |
| 14.     | NZ_JACGMJ010000001.1_35  | 3               | GH65(317-695)                 | GH65          | GH65             |
| 15.     | NZ_JACGMJ010000001.1_42  | 2               | GT4(213-359)                  | GT4           | N                |
| 16.     | NZ_JACGMJ010000002.1_13  | 3               | GH120(310-400)                | GH120         | GH120+CBM6       |
| 17.     | NZ_JACGMJ010000002.1_154 | 2               | N                             | CBM50         | CBM50            |
| 18.     | NZ_JACGMJ010000002.1_178 | 3               | GH43_11(4-315)                | GH43_11       | GH43             |
| 19.     | NZ_JACGMJ010000002.1_187 | 1               | N                             | N             | CBM2             |
| 20.     | NZ_JACGMJ010000002.1_219 | 3               | GT28(188-352)                 | GT28          | GT28             |
| 21.     | NZ_JACGMJ010000002.1_270 | 1               | N                             | N             | GH23             |
| 22.     | NZ_JACGMJ010000002.1_285 | 3               | GH73(79-217)                  | GH73          | GH73             |
| 23.     | NZ_JACGMJ010000002.1_70  | 3               | GH1(6-479)                    | GH1           | GH1              |

|     |                         |   |                             |         |                |
|-----|-------------------------|---|-----------------------------|---------|----------------|
| 24. | NZ_JACGMJ010000002.1_73 | 3 | GH1(4-482)                  | GH1     | GH1            |
| 25. | NZ_JACGMJ010000002.1_81 | 3 | GH25(33-210)                | GH25    | GH25+CBM50     |
| 26. | NZ_JACGMJ010000002.1_93 | 1 | N                           | CBM50   | N              |
| 27. | NZ_JACGMJ010000003.1_22 | 2 | GT2_Glycos_transf_2(9-135)  | GT2     | N              |
| 28. | NZ_JACGMJ010000003.1_33 | 2 | GT4(336-486)                | GT4     | N              |
| 29. | NZ_JACGMJ010000003.1_34 | 2 | GT4(329-478)                | GT4     | N              |
| 30. | NZ_JACGMJ010000003.1_57 | 1 | N                           | CBM50   | N              |
| 31. | NZ_JACGMJ010000003.1_77 | 2 | GT4(182-324)                | GT4     | N              |
| 32. | NZ_JACGMJ010000003.1_84 | 1 | N                           | GT30    | N              |
| 33. | NZ_JACGMJ010000004.1_18 | 3 | GH25(33-210)                | GH25    | GH25+CBM50     |
| 34. | NZ_JACGMJ010000004.1_22 | 3 | GT51(78-256)                | GT51    | GT51           |
| 35. | NZ_JACGMJ010000004.1_38 | 3 | GH1(4-482)                  | GH1     | GH1            |
| 36. | NZ_JACGMJ010000005.1_4  | 3 | GT4(159-310)                | GT4     | GT4            |
| 37. | NZ_JACGMJ010000005.1_5  | 3 | GT4(198-330)                | GT4     | GT4            |
| 38. | NZ_JACGMJ010000006.1_21 | 2 | GT2_Glyco_trans_2_3(89-306) | GT2     | N              |
| 39. | NZ_JACGMJ010000006.1_29 | 1 | N                           | GH13_11 | N              |
| 40. | NZ_JACGMJ010000006.1_46 | 1 | N                           | GH6     | N              |
| 41. | NZ_JACGMJ010000007.1_3  | 3 | GH31(274-703)               | GH31    | GH31           |
| 42. | NZ_JACGMJ010000007.1_5  | 3 | GH8(36-366)                 | GH8     | GH8+CBM36+CBM6 |
| 43. | NZ_JACGMJ010000007.1_87 | 2 | N                           | CBM50   | GH23           |
| 44. | NZ_JACGMJ010000007.1_90 | 2 | GT51(59-230)                | GT51    | N              |
| 45. | NZ_JACGMJ010000008.1_47 | 3 | GH1(3-463)                  | GH1     | GH1            |
| 46. | NZ_JACGMJ010000008.1_57 | 1 | N                           | GH42    | N              |
| 47. | NZ_JACGMJ010000008.1_58 | 3 | GH36(16-715)                | GH36    | GH36           |
| 48. | NZ_JACGMJ010000009.1_23 | 1 | N                           | GH28    | N              |
| 49. | NZ_JACGMJ010000009.1_47 | 1 | N                           | GT4     | N              |



|     |                         |   |                               |              |                             |
|-----|-------------------------|---|-------------------------------|--------------|-----------------------------|
| 50. | NZ_JACGMJ010000009.1_48 | 2 | GT4(374-560)                  | GT4          | N                           |
| 51. | NZ_JACGMJ010000009.1_50 | 1 | N                             | GT13         | N                           |
| 52. | NZ_JACGMJ010000010.1_45 | 3 | GH70(342-1133)                | GH70         | GH70                        |
| 53. | NZ_JACGMJ010000010.1_51 | 3 | GH13_31(29-380)               | GH13_31      | GH13                        |
| 54. | NZ_JACGMJ010000011.1_41 | 1 | N                             | GT2          | N                           |
| 55. | NZ_JACGMJ010000012.1_34 | 1 | N                             | CBM50        | N                           |
| 56. | NZ_JACGMJ010000012.1_39 | 2 | N                             | GT0          | GT0                         |
| 57. | NZ_JACGMJ010000012.1_40 | 3 | GH8(37-364)                   | GH8          | GH8                         |
| 58. | NZ_JACGMJ010000012.1_41 | 2 | GT2_Glyco_transf_2_3(49-279)  | GT2          | N                           |
| 59. | NZ_JACGMJ010000012.1_8  | 3 | GH32(13-318)                  | GH32         | GH32                        |
| 60. | NZ_JACGMJ010000013.1_16 | 2 | N                             | CBM50        | GH73+CBM50                  |
| 61. | NZ_JACGMJ010000013.1_51 | 1 | N                             | CBM50        | N                           |
| 62. | NZ_JACGMJ010000013.1_52 | 1 | N                             | CBM50        | N                           |
| 63. | NZ_JACGMJ010000013.1_64 | 3 | GH3(37-275)                   | GH3          | GH3+CBM6                    |
| 64. | NZ_JACGMJ010000013.1_8  | 2 | GT2_Glycos_transf_2(59-230)   | GT2          | N                           |
| 65. | NZ_JACGMJ010000014.1_12 | 3 | GH13_39(182-487)              | GH13_39      | GH13+GH77+CBM20+CBM34+CBM48 |
| 66. | NZ_JACGMJ010000014.1_13 | 3 | GT35(95-792)                  | GT35         | GT35                        |
| 67. | NZ_JACGMJ010000014.1_14 | 3 | GT5(2-475)                    | GT5          | GT5                         |
| 68. | NZ_JACGMJ010000014.1_16 | 1 | N                             | GH13_9       | N                           |
| 69. | NZ_JACGMJ010000014.1_17 | 3 | CBM48(29-111)+GH13_9(177-473) | CBM48+GH13_9 | GH13+CBM48                  |
| 70. | NZ_JACGMJ010000014.1_29 | 3 | GH43_11(3-304)                | GH43_11      | GH43                        |
| 71. | NZ_JACGMJ010000014.1_3  | 1 | N                             | AA1          | N                           |
| 72. | NZ_JACGMJ010000016.1_28 | 1 | N                             | GT47         | N                           |
| 73. | NZ_JACGMJ010000016.1_29 | 1 | N                             | CBM50        | N                           |
| 74. | NZ_JACGMJ010000016.1_40 | 3 | CE9(6-375)                    | CE9          | CE9                         |
| 75. | NZ_JACGMJ010000017.1_28 | 1 | N                             | GH13_3       | N                           |

|     |                         |   |                |       |      |
|-----|-------------------------|---|----------------|-------|------|
| 76. | NZ_JACGMJ010000018.1_17 | 3 | GH1(3-473)     | GH1   | GH1  |
| 77. | NZ_JACGMJ010000018.1_7  | 1 | N              | CBM50 | N    |
| 78. | NZ_JACGMJ010000019.1_9  | 1 | N              | GT4   | N    |
| 79. | NZ_JACGMJ010000020.1_14 | 3 | GH1(5-214)     | GH1   | GH1  |
| 80. | NZ_JACGMJ010000020.1_15 | 3 | GH1(9-264)     | GH1   | GH1  |
| 81. | NZ_JACGMJ010000022.1_5  | 1 | N              | CBM50 | N    |
| 82. | NZ_JACGMJ010000022.1_8  | 1 | N              | GH32  | N    |
| 83. | NZ_JACGMJ010000024.1_2  | 3 | GH70(442-1238) | GH70  | GH70 |

16 **Table S3: Protein list observed in 2 *Weisella* spp. but not in 4 *Leuconostoc* spp.**

| Sr No. | Representative functions                                                                  |
|--------|-------------------------------------------------------------------------------------------|
| 1.     | hypothetical protein                                                                      |
| 2.     | hypothetical protein                                                                      |
| 3.     | Secreted antigen GbpB/SagA/PcsB, putative peptidoglycan hydrolase                         |
| 4.     | Probable tautomerase yrdN (EC 5.3.2.-)                                                    |
| 5.     | hypothetical protein                                                                      |
| 6.     | Substrate-specific component BioY of biotin ECF transporter                               |
| 7.     | Transcriptional regulator in cluster with unspecified monosaccharide ABC transport system |
| 8.     | Cell division protein FtsL                                                                |
| 9.     | Glycerophosphoryl diester phosphodiesterase (EC 3.1.4.46)                                 |
| 10.    | chromate reductase                                                                        |
| 11.    | hypothetical protein                                                                      |
| 12.    | Probable low-affinity inorganic phosphate transporter                                     |
| 13.    | Glucosamine-6-phosphate deaminase (EC 3.5.99.6)                                           |
| 14.    | Acetyl-coenzyme A carboxyl transferase alpha chain (EC 6.4.1.2)                           |
| 15.    | Acetyl-coenzyme A carboxyl transferase beta chain (EC 6.4.1.2)                            |
| 16.    | Biotin carboxyl carrier protein of acetyl-CoA carboxylase                                 |
| 17.    | hypothetical protein                                                                      |
| 18.    | hypothetical protein                                                                      |
| 19.    | hypothetical protein                                                                      |
| 20.    | Peptide-methionine (S)-S-oxide reductase MsrA (EC 1.8.4.11)                               |
| 21.    | Methionine ABC transporter substrate-binding protein                                      |
| 22.    | NADH dehydrogenase (EC 1.6.99.3)                                                          |
| 23.    | hypothetical protein                                                                      |
| 24.    | 3-phosphoshikimate 1-carboxyvinyltransferase (EC 2.5.1.19)                                |
| 25.    | FIG01073890: hypothetical protein                                                         |
| 26.    | hypothetical protein                                                                      |
| 27.    | hypothetical protein                                                                      |
| 28.    | Glyoxalase family protein                                                                 |
| 29.    | DUF124 domain-containing protein                                                          |
| 30.    | hypothetical protein                                                                      |
| 31.    | Glycosyltransferase                                                                       |
| 32.    | hypothetical protein                                                                      |
| 33.    | hypothetical protein                                                                      |
| 34.    | hypothetical protein                                                                      |
| 35.    | Methionine ABC transporter substrate-binding protein                                      |
| 36.    | L-seryl-tRNA(Sec) selenium transferase (EC 2.9.1.1)                                       |
| 37.    | Alanine racemase (EC 5.1.1.1)                                                             |
| 38.    | hypothetical protein                                                                      |
| 39.    | Hypothetical secreted protein                                                             |
| 40.    | Purine nucleoside ABC transporter, substrate-binding protein                              |
| 41.    | hypothetical protein                                                                      |
| 42.    | D-alanine aminotransferase (EC 2.6.1.21)                                                  |
| 43.    | hypothetical protein                                                                      |
| 44.    | NADH dehydrogenase (EC 1.6.99.3)                                                          |
| 45.    | Purine nucleoside ABC transporter, substrate-binding protein                              |
| 46.    | Predicted hydrolase of the HAD superfamily                                                |

|     |                                                                                            |
|-----|--------------------------------------------------------------------------------------------|
| 47. | HAD phosphatase YigL                                                                       |
| 48. | hypothetical protein                                                                       |
| 49. | Putative oxidoreductase                                                                    |
| 50. | hypothetical protein                                                                       |
| 51. | hypothetical protein                                                                       |
| 52. | Zinc-type alcohol dehydrogenase-like protein                                               |
| 53. | Oligopeptide ABC transporter, periplasmic oligopeptide-binding protein OppA (TC 3.A.1.5.1) |
| 54. | hypothetical protein                                                                       |
| 55. | hypothetical protein                                                                       |
| 56. | oxidoreductase of aldo/keto reductase family, subgroup 1                                   |
| 57. | hypothetical protein                                                                       |
| 58. | Thymidine kinase (EC 2.7.1.21)                                                             |
| 59. | Broad-specificity multidrug efflux pump YkkC                                               |
| 60. | hypothetical protein                                                                       |
| 61. | Uncharacterized MFS-type transporter                                                       |
| 62. | hypothetical protein                                                                       |
| 63. | hypothetical protein                                                                       |
| 64. | Neopullulanase (EC 3.2.1.135)                                                              |
| 65. | Glycogen phosphorylase (EC 2.4.1.1)                                                        |
| 66. | Glycogen synthase, ADP-glucose transglucosylase (EC 2.4.1.21)                              |
| 67. | hypothetical protein                                                                       |
| 68. | Glucose-1-phosphate adenylyltransferase (EC 2.7.7.27)                                      |
| 69. | 1,4-alpha-glucan (glycogen) branching enzyme, GH-13-type (EC 2.4.1.18)                     |
| 70. | hypothetical protein                                                                       |
| 71. | hypothetical protein                                                                       |
| 72. | hypothetical protein                                                                       |
| 73. | hypothetical protein                                                                       |
| 74. | COG5039: Exopolysaccharide biosynthesis protein                                            |
| 75. | hypothetical protein                                                                       |
| 76. | Immunoreactive protein Se23.5 (Fragment)                                                   |
| 77. | Inner membrane protein YbiR, putative anion permease                                       |
| 78. | hypothetical protein                                                                       |
| 79. | Nicotinamidase/isochorismatase family protein                                              |
| 80. | Efflux ABC transporter, ATP-binding protein                                                |
| 81. | Efflux ABC transporter, permease protein                                                   |
| 82. | 6-phospho-beta-glucosidase (EC 3.2.1.86)                                                   |
| 83. | FIG00749917: hypothetical protein                                                          |
| 84. | Multimodular transpeptidase-transglycosylase (EC 2.4.1.129) (EC 3.4.-.-)                   |
| 85. | hypothetical protein                                                                       |
| 86. | DedA protein                                                                               |
| 87. | Transcriptional regulator, AcrR family                                                     |
| 88. | hypothetical protein                                                                       |
| 89. | ABC-type amino acid transport/signal transduction system, periplasmic component/domain     |
| 90. | NAD-dependent protein deacetylase of SIR2 family                                           |
| 91. | hypothetical protein                                                                       |
| 92. | hypothetical protein                                                                       |
| 93. | hypothetical protein                                                                       |

|      |                                                                                                                         |
|------|-------------------------------------------------------------------------------------------------------------------------|
| 94.  | Coenzyme A transferase                                                                                                  |
| 95.  | Enoyl-[acyl-carrier-protein] reductase [FMN, NADH] (EC 1.3.1.9), FabK => refractory to triclosan                        |
| 96.  | hypothetical protein                                                                                                    |
| 97.  | Aryldialkylphosphatase related protein                                                                                  |
| 98.  | hypothetical protein                                                                                                    |
| 99.  | hypothetical protein                                                                                                    |
| 100. | Uncharacterized MFS-type transporter                                                                                    |
| 101. | Permease of the drug/metabolite transporter (DMT) superfamily                                                           |
| 102. | bacterial seryl-tRNA synthetase related                                                                                 |
| 103. | hypothetical protein                                                                                                    |
| 104. | hypothetical protein                                                                                                    |
| 105. | Exopolysaccharide biosynthesis protein related to N-acetylglucosamine-1-phosphodiester alpha-N-acetylglucosaminidase    |
| 106. | hypothetical protein                                                                                                    |
| 107. | FIG01032596: hypothetical protein                                                                                       |
| 108. | hypothetical protein                                                                                                    |
| 109. | hypothetical protein                                                                                                    |
| 110. | Shikimate kinase I (EC 2.7.1.71)                                                                                        |
| 111. | Sugar:proton symporter                                                                                                  |
| 112. | hypothetical protein                                                                                                    |
| 113. | hypothetical protein                                                                                                    |
| 114. | hypothetical protein                                                                                                    |
| 115. | hypothetical protein                                                                                                    |
| 116. | hypothetical protein                                                                                                    |
| 117. | probable RNA methyltransferase                                                                                          |
| 118. | hypothetical protein                                                                                                    |
| 119. | hypothetical protein                                                                                                    |
| 120. | hypothetical protein                                                                                                    |
| 121. | hypothetical protein                                                                                                    |
| 122. | hypothetical protein                                                                                                    |
| 123. | probable RNA methyltransferase                                                                                          |
| 124. | Broad-specificity multidrug efflux pump YkkC                                                                            |
| 125. | hypothetical protein                                                                                                    |
| 126. | small multidrug resistance family (SMR) protein                                                                         |
| 127. | PTS system, trehalose-specific IIB component (EC 2.7.1.69) / PTS system, trehalose-specific IIC component (EC 2.7.1.69) |
| 128. | hypothetical protein                                                                                                    |
| 129. | Uncharacterized oxidoreductase YhhX                                                                                     |
| 130. | Inosine-uridine preferring nucleoside hydrolase (EC 3.2.2.1)                                                            |
| 131. | hypothetical protein                                                                                                    |
| 132. | hypothetical protein                                                                                                    |
| 133. | hypothetical protein                                                                                                    |
| 134. | Poly(glycerol-phosphate) alpha-glucosyltransferase (EC 2.4.1.52)                                                        |
| 135. | DNA-binding protein HBSu                                                                                                |
| 136. | hypothetical protein                                                                                                    |
| 137. | hypothetical protein                                                                                                    |
| 138. | hypothetical protein                                                                                                    |
| 139. | hypothetical protein                                                                                                    |

|      |                                                                                                                                |
|------|--------------------------------------------------------------------------------------------------------------------------------|
| 140. | RecD-like DNA helicase YrrC                                                                                                    |
| 141. | Serine hydroxymethyltransferase (EC 2.1.2.1)                                                                                   |
| 142. | UPF0473 protein YrzB                                                                                                           |
| 143. | hypothetical protein                                                                                                           |
| 144. | hypothetical protein                                                                                                           |
| 145. | hypothetical protein                                                                                                           |
| 146. | Oligopeptide ABC transporter, ATP-binding protein OppF (TC 3.A.1.5.1)                                                          |
| 147. | Oligopeptide ABC transporter, ATP-binding protein OppD (TC 3.A.1.5.1)                                                          |
| 148. | ABC transporter, permease protein 2 (cluster 5, nickel/peptides/opines)                                                        |
| 149. | Dipeptide ABC transporter, permease protein DppB (TC 3.A.1.5.2)                                                                |
| 150. | Oligopeptide ABC transporter, periplasmic oligopeptide-binding protein OppA (TC 3.A.1.5.1)                                     |
| 151. | RecD-like DNA helicase YrrC                                                                                                    |
| 152. | hypothetical protein                                                                                                           |
| 153. | Oxidoreductase, short-chain dehydrogenase/reductase family                                                                     |
| 154. | hypothetical protein                                                                                                           |
| 155. | hypothetical protein                                                                                                           |
| 156. | hypothetical protein                                                                                                           |
| 157. | hypothetical protein                                                                                                           |
| 158. | Predicted acyltransferase                                                                                                      |
| 159. | Hydrolase, HAD superfamily                                                                                                     |
| 160. | Acylamino-acid-releasing enzyme (EC 3.4.19.1)                                                                                  |
| 161. | Transcriptional regulator, PadR family                                                                                         |
| 162. | Methionine ABC transporter substrate-binding protein                                                                           |
| 163. | hypothetical protein                                                                                                           |
| 164. | Lead, cadmium, zinc and mercury transporting ATPase (EC 3.6.3.3) (EC 3.6.3.5); Copper-translocating P-type ATPase (EC 3.6.3.4) |
| 165. | hypothetical protein                                                                                                           |
| 166. | hypothetical protein                                                                                                           |
| 167. | hypothetical protein                                                                                                           |
| 168. | hypothetical protein                                                                                                           |
| 169. | oxidoreductase of aldo/keto reductase family, subgroup 1                                                                       |
| 170. | hypothetical protein                                                                                                           |
| 171. | hypothetical protein                                                                                                           |
| 172. | Zinc-type alcohol dehydrogenase-like protein                                                                                   |
| 173. | hypothetical protein                                                                                                           |
| 174. | L-lactate permease                                                                                                             |
| 175. | hypothetical protein                                                                                                           |
| 176. | FIG00627713: hypothetical protein                                                                                              |
| 177. | alpha-xylosidase (EC 3.2.1.177)                                                                                                |
| 178. | PTS system, cellobiose-specific IIB component (EC 2.7.1.205)                                                                   |
| 179. | Two-component transcriptional response regulator, OmpR family                                                                  |
| 180. | hypothetical protein                                                                                                           |
| 181. | hypothetical protein                                                                                                           |
| 182. | D-serine/D-alanine/glycine transporter                                                                                         |
| 183. | hypothetical protein                                                                                                           |
| 184. | hypothetical protein                                                                                                           |
| 185. | Transcriptional regulator, LacI family                                                                                         |

|      |                                                   |
|------|---------------------------------------------------|
| 186. | hypothetical protein                              |
| 187. | Mn-dependent transcriptional regulator MntR       |
| 188. | hypothetical protein                              |
| 189. | YoeB toxin protein                                |
| 190. | Short-chain dehydrogenase                         |
| 191. | hypothetical protein                              |
| 192. | hypothetical protein                              |
| 193. | hypothetical protein                              |
| 194. | hypothetical protein                              |
| 195. | hypothetical protein                              |
| 196. | hypothetical protein                              |
| 197. | hypothetical protein                              |
| 198. | hypothetical protein                              |
| 199. | hypothetical protein                              |
| 200. | hypothetical protein                              |
| 201. | Uncharacterized protein YaaN                      |
| 202. | hypothetical protein                              |
| 203. | Uncharacterized MFS-type transporter              |
| 204. | hypothetical protein                              |
| 205. | hypothetical protein                              |
| 206. | hypothetical protein                              |
| 207. | Immunodominant staphylococcal antigen A precursor |
| 208. | hypothetical protein                              |
| 209. | Integral membrane protein TerC                    |
| 210. | hypothetical protein                              |
| 211. | hypothetical protein                              |
| 212. | Exonuclease SbcD                                  |
| 213. | Exonuclease SbcC                                  |
| 214. | NUDIX hydrolase                                   |
| 215. | hypothetical protein                              |
| 216. | hypothetical protein                              |
| 217. | hypothetical protein                              |
| 218. | hypothetical protein                              |
| 219. | hypothetical protein                              |
| 220. | hypothetical protein                              |

17

18

19

20

21

22

23

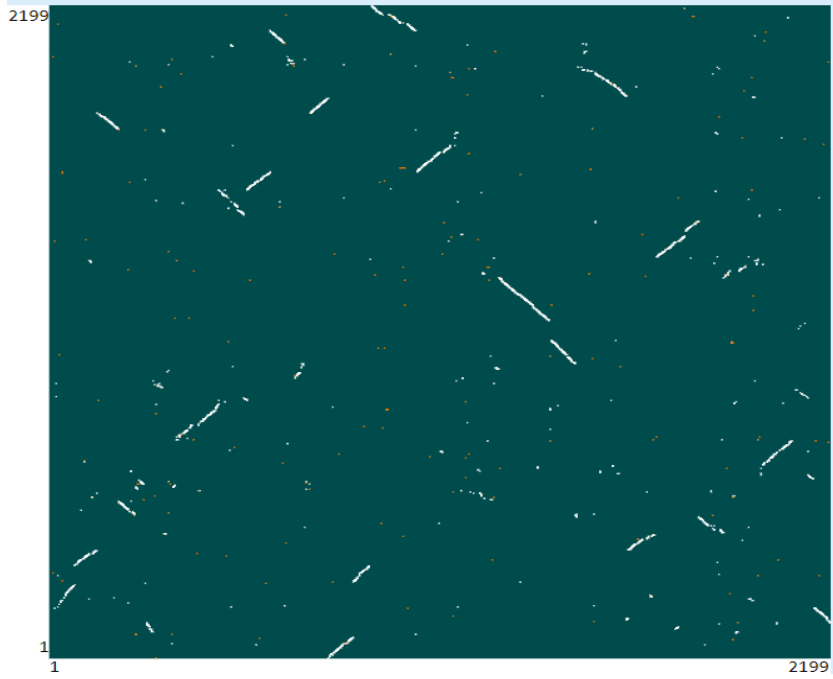

24

25

26 Fig. S1. Dot plot matrix of *W. confusa* CCK931 and *W. cibaria* YRK005.

27

28

29

30

31

32

33

34

35

36

37

38

39



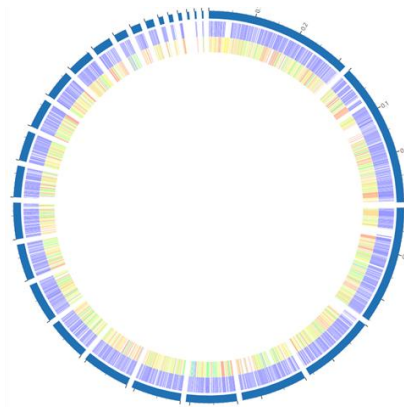

|                         | Percent protein sequence identity |      |      |      |    |    |    |    |    |    |    |    |    |    |    |    |
|-------------------------|-----------------------------------|------|------|------|----|----|----|----|----|----|----|----|----|----|----|----|
| Bidirectional best hit  | 100                               | 99.9 | 99.8 | 99.5 | 99 | 98 | 95 | 90 | 80 | 70 | 60 | 50 | 40 | 30 | 20 | 10 |
| Unidirectional best hit | 100                               | 99.9 | 99.8 | 99.5 | 99 | 98 | 95 | 90 | 80 | 70 | 60 | 50 | 40 | 30 | 20 | 10 |

40

41 Fig. S2. Circular map based on protein sequence identity of *W. confusa* CCK931 and *W. cibaria* YRK005.  
 42 CCK931 was used as a reference. Protein sequence identity (in percent) is depicted by different color  
 43 codes as shown in the figure.

44

45

46

47

48

49

50

51

52

53

54

55

56

57

58

59

60

61

62

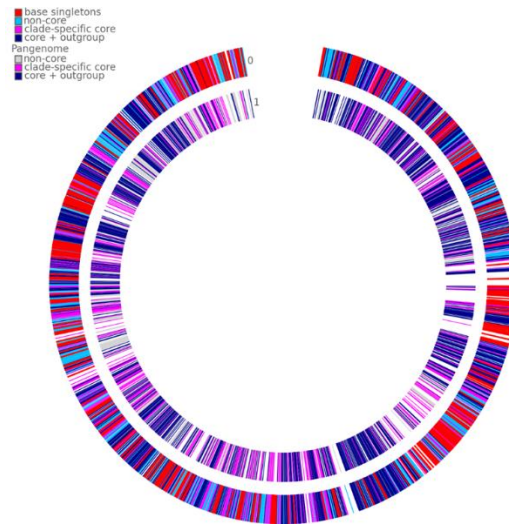

64

65 Fig. S3. Circle plot depicting the clade specific genes. *W. confusa* CCK931 was used as reference genome  
 66 and *E. coli* MG1655 as an outgroup. 0 depicts *W. confusa* CCK931 and 1 depicts *W. cibaria* YRK005. Genes  
 67 in pink are unique to *Weissella* spp.

68 Singleton: The genes in the reference genome with no sequence homology to genes in other genome.  
 69 Clade-specific Core: Core gene orthologue clusters contain functions that are universal to all life.  
 70 Nonspecific Core is present in all genomes, whereas Clade-specific Core is present in all but the  
 71 outgroup genome. That means Clade-specific Core is present only in *Weissella* and not in *E. coli*. Other  
 72 than these are non-core genes.
